| Peptide        | (Sub)phylum         | Species                                                                                 | Gene cluster (NCBI accession + antiSMASH gene cluster number) | NRP search tag                                                             |
|----------------|---------------------|-----------------------------------------------------------------------------------------|---------------------------------------------------------------|----------------------------------------------------------------------------|
| Micropeptin    | Cyanobacteria       | <i>Microcystis Aeruginosa</i> K-139                                                     | AB481215_c1                                                   | Asp-Thr-Arg-Thr-Ile-Tyr-Ile<br>Ala-Asp-Gly-Phe-Pro-Tyr-Trp-<br>Gly-Leu-Leu |
| Skylamycin     | Actinobacteria      | <i>Streptomyces</i> sp. Acta 2897<br><i>Streptomyces pyridomyceticus</i><br>NRRL B-2517 | JF430460_c1                                                   | Pip-Thr-Ala-Xxx-Xxx<br>Gly-Cys-Ser-Cys-Gly                                 |
| Pyridomycin    | Actinobacteria      | <i>Myxococcus xanthus</i> DK897                                                         | HM436809_c1                                                   | Pro-Ala-Thr-Phe-Ala-Phe-Ile-Pro                                            |
| Althiomycin    | Deltaproteobacteria | <i>Streptomyces griseoflavus</i> w-384                                                  | HQ542230_c1                                                   | Thr-Leu-Leu-Phe-Val-Phe-Val                                                |
| Hormaomycin    | Actinobacteria      | <i>Bacillus</i> sp. NK 2003                                                             | JF828091_c1                                                   | Gln-Gly-Pro-Phe-Ile-Pro                                                    |
| Koranimine     | Firmicutes          | <i>Nostoc</i> sp. Strain 152                                                            | JF430079_c1                                                   | Ser-Ala-Gly-Hpg-Ala-Tyr<br>Ser-Leu-Val-Ser-Val-Ser-Tyr-Lys-<br>Ala         |
| Nostophycin    | Cyanobacteria       | <i>Streptomyces roseosporus</i> NRRL 11379                                              | NZ_ABYX01000222_c1                                            | Asp-Arg-Xxx-Glu-Ser<br>Tyr-Met-Dab-Trp                                     |
| Arylomycin     | Actinobacteria      | <i>Myxococcus xanthus</i> DK 1622                                                       | NC_008095_c11                                                 | Xxx-Asp-Dab-Asp-Gly-Orn                                                    |
| Myxoprincomide | Deltaproteobacteria | <i>Nostoc</i> sp. 73.1                                                                  | JF342711_c1                                                   | Cys-Thr                                                                    |
| Nodularin      | Cyanobacteria       | <i>Streptomyces</i> sp. DSM5940                                                         | HQ287563_c1                                                   | Cys-Leu                                                                    |
| Napsamycin     | Actinobacteria      | <i>Ralstonia eutropha</i> H16                                                           | NC_008314_c1                                                  | Thr-Orn                                                                    |
| Cupriachelin   | Betaproteobacteria  | <i>Actinoalloteichus</i> sp. WH1-2216-6                                                 | JF419316_c1                                                   | Lys-Lys-Thr                                                                |
| Caerulomycin   | Actinobacteria      | <i>Streptomyces</i> sp. CS40                                                            | HE575208_c1                                                   | Dhb-Ala-Thr                                                                |
| Collismycin    | Actinobacteria      | <i>Rhodococcus jostii</i> RHA1                                                          | NC_008268_c8                                                  | Sal-Thr-Lys                                                                |
| Rhodoachelin   | Actinobacteria      | <i>Nocardia farcinica</i> IFM 10152                                                     | NC_006361_c3                                                  |                                                                            |
| Nocobactin     | Actinobacteria      | <i>Paenibacillus eigii</i> B69                                                          | HQ668144_c1                                                   |                                                                            |
| Paenibactin    | Firmicutes          | <i>Mycobacterium tuberculosis</i> H37Rv                                                 | NC_000962_c9                                                  |                                                                            |
| Mycobactin     | Actinobacteria      |                                                                                         |                                                               |                                                                            |

**Table S1: NRP2Path benchmarking dataset.** The table displays 18 recently experimentally characterized NRPs and their biosynthetic gene clusters used for benchmarking NRP2Path. Rare amino acids that are not covered by the Pep2Path translation table are marked as 'Xxx'.
